# Supplementary material for: Macrophage-Targeted Dextran Sulfate-Dexamethasone Conjugate Micelles for Effective Treatment of Rheumatoid Arthritis
Source: MDPI journal article supplement (doi:10.3390/molecules28020591), 2023-01-06
Supplement: s1 [file s1]

# Macrophage-Targeted Dextran Sulfate-dexamethasone Conjugate Micelles for Effective Treatment of Rheumatoid Arthritis

Jiangfan Han <sup>1,2,†</sup>, Ren Na <sup>3,†</sup>, Ningning Zhao <sup>2,†</sup>, Xiaofeng Yuan <sup>2</sup>, Linke Fu <sup>2</sup>, Jianmei Jing <sup>4</sup>, Aironq Qian <sup>1,\*</sup> and Weiliang Ye <sup>2,\*</sup>

<sup>1</sup> Lab for Bone Metabolism, Key Lab for Space Biosciences and Biotechnology, School of Life Sciences, Northwestern Polytechnical University, Xi'an 710072, China; jfanhan@mail.nwpu.edu.cn (J.H.)

<sup>2</sup> Department of Pharmaceutics, School of Pharmacy, Fourth Military Medical University, Xi'an 710032, China; 18729517815@163.com (N.Z.); xiaofeng012345@163.com (X.Y.); f2314280762@163.com (L.F.)

<sup>3</sup> Department of Epidemiology and Health Statistics, Faculty of Military Preventive Medicine, Fourth Military Medical University, Xi'an 710032, China; narentaiyang@126.com

<sup>4</sup> Department of Radiology, Xijing Hospital, Fourth Military Medical University, Xi'an 710038, China; jjm13468927661@163.com

\* Correspondence: qianair@nwpu.edu.cn (A.Q.); yaojixue@fmmu.edu.cn (W.Y.); Tel.: +86-29-8477-6783 (W.Y.)

† These authors contributed equally to this work.

**Citation:** Han, J.; Na, R.; Zhao, N.; Yuan, X.; Fu, L.; Jing, J.; Qian, A.; Ye, W. Macrophage-Targeted Dextran Sulfate-Dexamethasone Conjugate Micelles for Effective Treatment of Rheumatoid Arthritis. *Molecules* **2023**, *28*, x. <https://doi.org/10.3390/molecules28020591>

Academic Editor: Yi Lu

Received: 1 December 2022

Revised: 28 December 2022

Accepted: 29 December 2022

Published: 6 January 2023

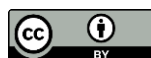

**Copyright:** © 2023 by the authors. Submitted for possible open access publication under the terms and conditions of the Creative Commons Attribution (CC BY) license (<https://creativecommons.org/licenses/by/4.0/>).

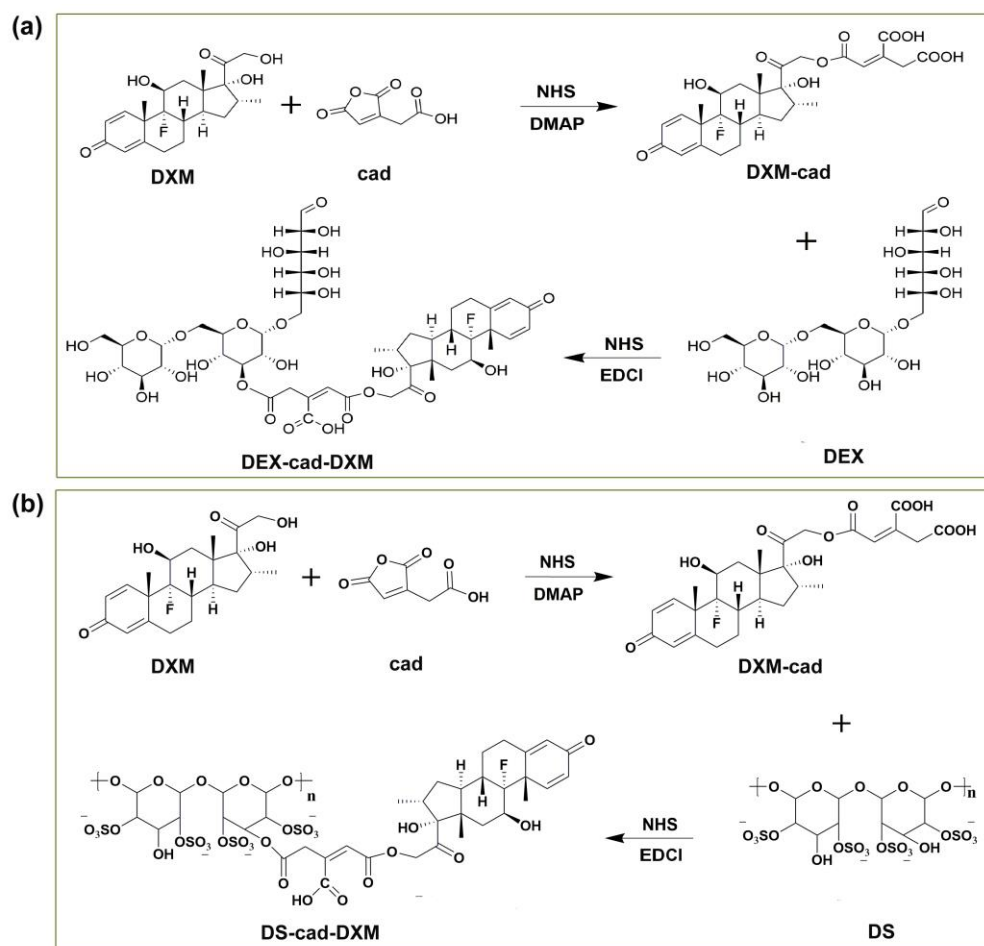

**Figure S1.** Synthesis route of DEX-cad-DXM (a) and DS-cad-DXM (b) conjugates.

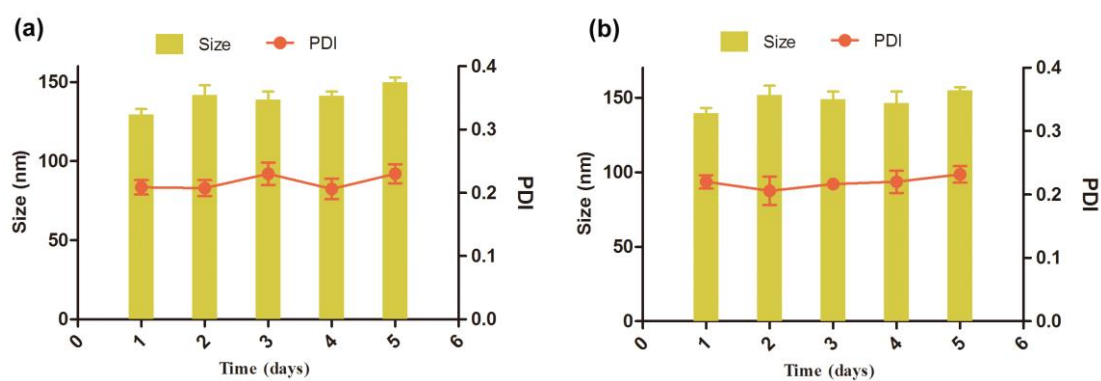

**Figure S2.** The stability of DXM@DS-cad-DXM micelles (a) and DXM@DEX-cad-DXM micelles (b) in pH 7.4 solution at 37 °C for 5 days. Data are presented as the mean  $\pm$  SD (n = 3).

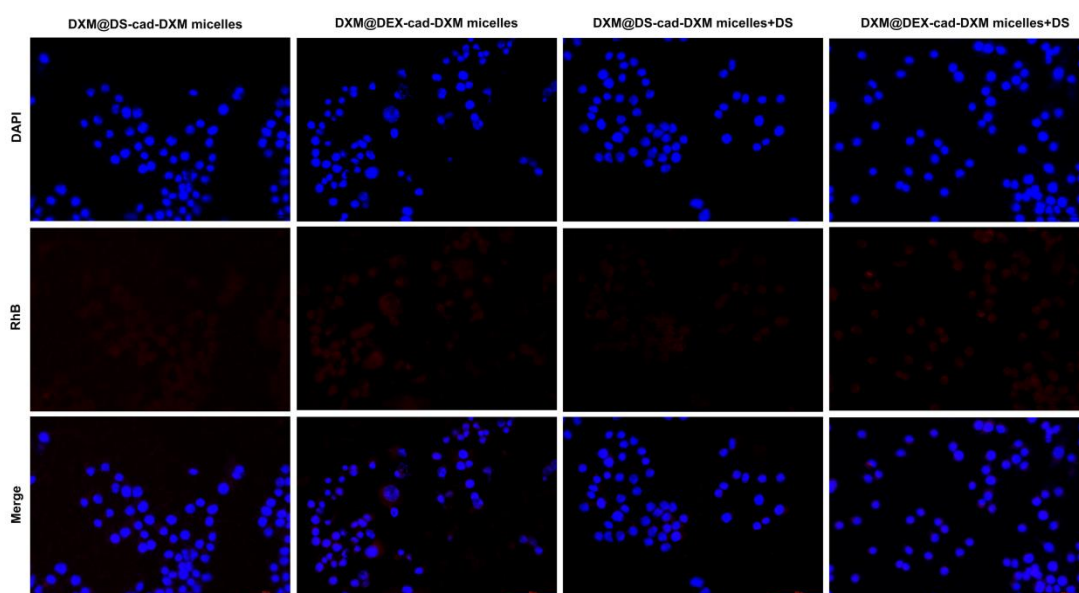

**Figure S3.** Fluorescent images of the DXM@DS-cad-DXM micelles and DXM@DEX-cad-DXM micelles uptake by the unactivated RAW264.7 cells for 2 h incubation. Scale bar = 50  $\mu$ m.

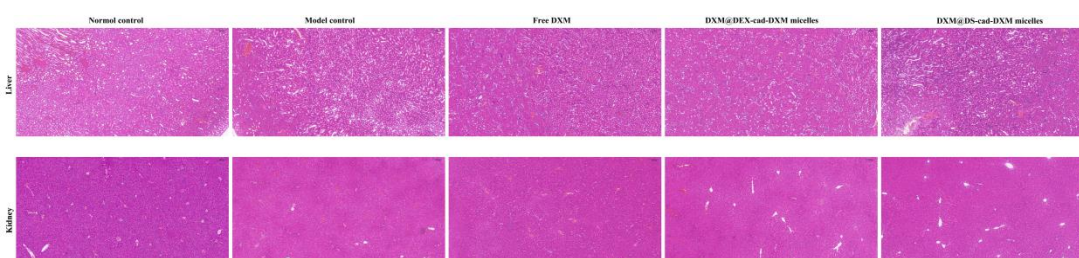

**Figure S4.** HE staining of liver and kidney after the treatment. Scale bar = 200  $\mu$ m.
